# Supplementary material
Source: PubMed Central journal article supplement (PMC3048324)

**Supplemental data:**

**Type 2 Diabetes (T2D) Associated Polymorphisms Regulate Expression of Adjacent Transcripts in Transformed Lymphocytes, Adipose and Muscle from Caucasian and African American Subjects**

Neeraj K Sharma, Kurt A Langberg, Ashis K Mondal, Steven C Elbein<sup>#</sup> and Swapan K Das\*

**Section on Endocrinology and Metabolism, Department of Internal Medicine, Wake**

**Forest University School of Medicine, Winston-Salem, NC**

<sup>#</sup> Dr Steven C Elbein passed away unexpectedly during the preparation of this manuscript.

**\*Address for Correspondence to:**

Swapan K Das, Ph.D.  
sdas@wfubmc.edu  
Section on Endocrinology and Metabolism  
Department of Internal Medicine  
Wake Forest University Health Sciences  
Medical Center Boulevard  
Winston-Salem, North Carolina 27157  
Telephone: 336-713-6057  
Fax: 336-713-7255

## **Supplemental Methods:**

**Genotyping:** Genomic DNA isolated from TLs or total blood samples were used for genotyping. Sequenom MassARRAY system (Sequenom Inc. SanDiego,CA) was used for genotyping 15 SNPs . Genotyping procedures were performed according to the manufacturer's iPLEX application guide at the genotyping laboratory of WFUHS Center for Genomics. Additional seven SNPs were genotyped by pre-designed Taqman SNP genotyping assays (Applied Biosystems Inc., Foster City, CA) using ABI-7500 Fast real time PCR system. One SNP was genotyped by Pyrosequencing (PSQ96, Qiagen Inc, Valencia, CA, USA; formerly Biotage, Sweden) using a modification of manufacturer's protocol that used a biotinylated universal primer (15). Details of all selected SNPs and genotyping assays are described in supplemental table-2. Genotyping was confirmed by 100% concordance in 10% blinded duplicates.

**RNA isolation:** Total RNA from TLs grown under standard conditions was extracted using RNeasy mini kit (Qiagen Inc., Valencia, CA). We extracted total RNA from subcutaneous adipose by using the RNeasy Lipid Tissue Mini kit (Qiagen Inc.) and from muscle using the Ultraspec RNA kit (Biotecx Laboratories, Inc, Houston, TX). The quantity and quality of the isolated total RNA samples were determined by ultraviolet spectrophotometry (Nanodrop, Thermo Scientific, USA) and electrophoresis (Experion nucleic acid analyzer, BioRad Laboratories, Inc., Hercules, CA) respectively.

## Supplemental Tables:

### Supplemental Table-1: Demographics of study population

|                                                                               | All          | European American | African American |
|-------------------------------------------------------------------------------|--------------|-------------------|------------------|
| N (T2D/Non-diabetic)                                                          | 168 (13/155) | 122(6/166)        | 46 (7/39)        |
| Gender (M/F)                                                                  | 73/95        | 44/78             | 29/17            |
| Age (Yrs)                                                                     | 40.9±10.4    | 40.0±10.7         | 43.5±9.3         |
| WHR                                                                           | 0.9±0.2      | 0.9±0.2           | 0.9±0.1          |
| BMI (kg/m <sup>2</sup> )                                                      | 29.5±5.9     | 29.4±5.8          | 29.8±6.1         |
| % FAT                                                                         | 33.0±9.9     | 34.5±9.4          | 29.3±10.2        |
| Glucose AUC (mmol·min/L) <sup>¶</sup>                                         | 626±411      | 636±419           | 599±391.2        |
| Insulin AUC (mmol·min/L) <sup>¶</sup>                                         | 18098±22588  | 18968±22512       | 15723±22936      |
| S <sub>i</sub> (×10 <sup>-4</sup> ·min <sup>-1</sup> [μU/ml] <sup>-1</sup> )* | 3.7±2.2      | 3.8±2.3           | 3.4±1.9          |
| AIR <sub>G</sub> (pmol/L)*                                                    | 3287±2578    | 2824±2156         | 4560±3188        |
| DI*                                                                           | 1636±1142    | 1470±1056         | 2091±1258        |
| S <sub>G</sub> (min <sup>-1</sup> )*                                          | 0.017±0.007  | 0.017±0.007       | 0.016±0.008      |

Continuous variables are shown as mean ± SD. ¶, Metabolic measurements from OGTT; \*, Metabolic traits from 135 non-diabetic individuals completed FSIGT evaluation. S<sub>i</sub>, insulin sensitivity index, Units are taken from MINMOD program. To convert values to SI units (X10<sup>-4</sup> min<sup>-1</sup>[pmol/l]<sup>-1</sup>) multiply by 0.167. AIR<sub>G</sub>, Acute insulin response to glucose; DI, Disposition index and S<sub>G</sub>, is the measure of the ability of glucose to promote its own uptake.

### Supplemental Table-2: Novel T2D associated SNPs from GWAS studies and Genotyping assays

Refer supplementary MS-Excel file (tab S.table-2)

### Supplemental Table-3: Primer sequences for quantitative real time PCR (qRT-PCR) assays

Refer supplementary MS-Excel file (tab S.table-3)

### Supplemental Table-4: Primer sequences of pyrosequencing assay for allele specific expression imbalance analyses

Refer supplementary MS-Excel file (tab S.table-4)

**Supplemental Table- 5: Correlation of metabolic traits with expression of transcripts adjacent to T2D GWAS associated SNPs in Human Subcutaneous Adipose and Skeletal Muscle**

| Gene Name     |   | Adipose       |                |                  | Muscle |                |                  |
|---------------|---|---------------|----------------|------------------|--------|----------------|------------------|
|               |   | BMI           | S <sub>I</sub> | AIR <sub>G</sub> | BMI    | S <sub>I</sub> | AIR <sub>G</sub> |
| ADAMTS9       | r | -0.060        | 0.074          | -0.079           | 0.054  | 0.149          | 0.018            |
|               | p | 0.468         | 0.412          | 0.378            | 0.507  | 0.102          | 0.843            |
| CAMK1D        | r | 0.114         | 0.028          | -0.037           | -0.003 | 0.059          | -0.004           |
|               | p | 0.165         | 0.755          | 0.677            | 0.970  | 0.517          | 0.968            |
| CDC123        | r | 0.039         | 0.003          | -0.010           | -0.046 | 0.126          | 0.082            |
|               | p | 0.638         | 0.978          | 0.912            | 0.574  | 0.168          | 0.370            |
| CDKAL1        | r | 0.028         | 0.030          | -0.079           | -0.077 | 0.153          | 0.072            |
|               | p | 0.734         | 0.736          | 0.379            | 0.340  | 0.092          | 0.429            |
| DNAJC11       | r | -0.061        | 0.093          | -0.071           | 0.035  | 0.144          | 0.077            |
|               | p | 0.460         | 0.303          | 0.428            | 0.670  | 0.113          | 0.399            |
| FTO           | r | 0.054         | -0.013         | 0.0004           | -0.050 | 0.154          | 0.058            |
|               | p | 0.512         | 0.881          | 0.997            | 0.535  | 0.090          | 0.524            |
| HHEX          | r | 0.138         | -0.112         | -0.015           | ND     |                |                  |
|               | p | 0.094         | 0.210          | 0.870            |        |                |                  |
| IDE           | r | 0.147         | -0.058         | 0.061            | ND     |                |                  |
|               | p | 0.073         | 0.517          | 0.495            |        |                |                  |
| JAZF1         | r | 0.102         | 0.005          | -0.039           | -0.074 | 0.165          | 0.050            |
|               | p | 0.214         | 0.957          | 0.663            | 0.365  | 0.069          | 0.586            |
| NOTCH2        | r | 0.059         | -0.045         | -0.022           | ND     |                |                  |
|               | p | 0.476         | 0.621          | 0.809            |        |                |                  |
| PKN2          | r | -0.092        | 0.085          | -0.125           | -0.076 | 0.140          | 0.087            |
|               | p | 0.264         | 0.342          | 0.164            | 0.352  | 0.123          | 0.339            |
| PPARG         | r | -0.147        | 0.151          | -0.061           | ND     |                |                  |
|               | p | 0.073         | 0.090          | 0.500            |        |                |                  |
| SMARCAD1      | r | 0.040         | 0.046          | -0.079           | -0.097 | <b>0.179</b>   | 0.074            |
|               | p | 0.625         | 0.606          | 0.378            | 0.229  | <b>0.048</b>   | 0.415            |
| SYN2          | r | -0.062        | 0.064          | 0.001            | ND     |                |                  |
|               | p | 0.455         | 0.473          | 0.993            |        |                |                  |
| TCF7L2 (13a+) | r | -0.012        | 0.025          | -0.126           | ND     |                |                  |
|               | p | 0.883         | 0.782          | 0.161            |        |                |                  |
| THADA         | r | 0.090         | 0.021          | -0.038           | -0.060 | 0.097          | 0.067            |
|               | p | 0.275         | 0.819          | 0.674            | 0.458  | 0.287          | 0.463            |
| TSPAN8        | r | 0.007         | -0.018         | -0.060           | -0.055 | 0.049          | 0.026            |
|               | p | 0.933         | 0.839          | 0.503            | 0.503  | 0.591          | 0.779            |
| VEGFA         | r | <b>-0.305</b> | <b>0.230</b>   | -0.134           | -0.120 | <b>0.228</b>   | 0.031            |
|               | p | <b>0.0002</b> | <b>0.010</b>   | 0.135            | 0.139  | <b>0.012</b>   | 0.731            |
| WFS1          | r | 0.037         | -0.029         | 0.007            | -0.057 | 0.131          | -0.017           |
|               | p | 0.657         | 0.745          | 0.934            | 0.483  | 0.150          | 0.849            |

r, partial correlation coefficient and p, statistical significance of partial correlation measures between metabolic traits with gene expressions after controlling for age, gender, and ethnicity. ND, not detected

**Supplemental Table-6: Association of SNPs showing AEI with total transcript expression of T2D GWAS implicated genes**

| Gene name | AI -SNP    | Major/Minor Allele (D/d) | Genotype count (DD/Dd/dd) | p*           | p(adj)**     |
|-----------|------------|--------------------------|---------------------------|--------------|--------------|
| CAMK1D    | rs1644394  | G/A                      | 49/27/6                   | 0.253        | 0.210        |
| CDC123    | rs1051055  | G/A                      | 40/34/8                   | 0.630        | 0.576        |
| DNAJC11   | rs1043681  | A/G                      | 36/38/9                   | <b>0.045</b> | <b>0.013</b> |
| SMARCAD1  | rs8336     | G/A                      | 28/39/17                  | 0.951        | 0.781        |
| SMARCAD1  | rs8026     | A/G                      | 28/35/20                  | 0.275        | 0.267        |
| THADA     | rs11899823 | T/C                      | 38/36/9                   | 0.940        | 0.930        |
| VEGFA     | rs2010963  | G/C                      | 38/35/9                   | 0.354        | 0.454        |

\*, p, statistical significance of genotypic association from analysis of variance analysis (ANOVA); \*\*, p(adj), statistical significance of genotypic association from mixed effects, general linear regression models and included genotype, gender, and T2D diagnosis as fixed factors.

## Supplemental figures:

**Supplemental Figure-1: Genotypic association of SNP rs9472138 with the expression of vascular endothelia growth factor A (VEGFA) transcript in transformed lymphocytes.** The box plot shows transcript level expression of VEGFA for different genotypes for SNP rs9472138. VEGFA expression is shown after 18S normalization and ln transformation. N=no. of samples. The box represents the interquartile range, which contains 50% of the values. The whiskers are lines that extend the box to the highest and lowest values, excluding outliers. A line across the box indicates the median.

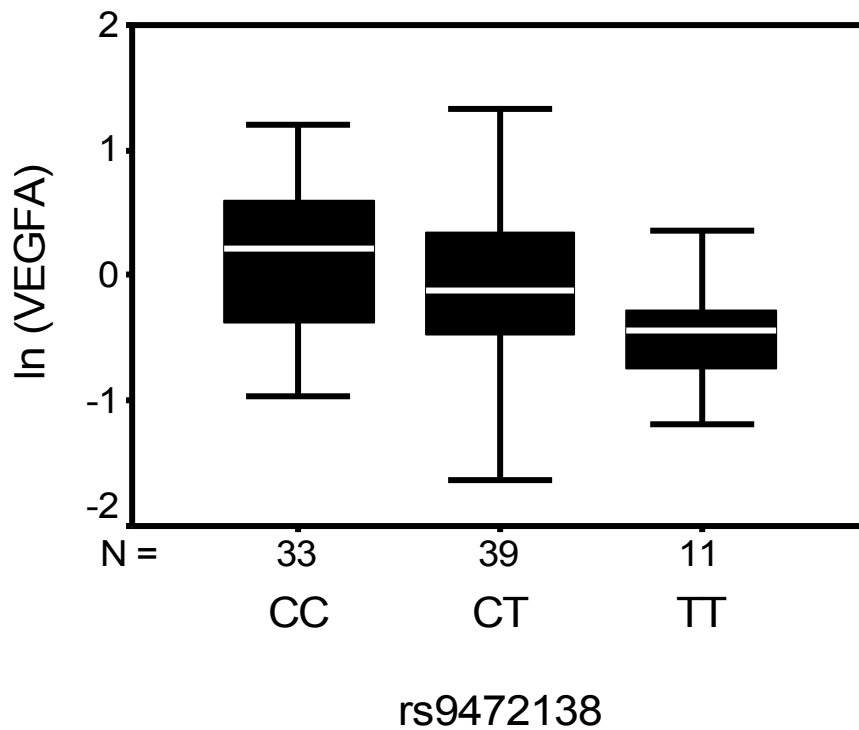

Supplement: jc.2010-1754_1.pdf [file jc.2010-1754_1.pdf]
